# Supplementary material for: Similar Features, Different Behaviors: A Comparative In Vitro Study of the Adipogenic Potential of Stem Cells from Human Follicle, Dental Pulp, and Periodontal Ligament
Source: MDPI journal article supplement (doi:10.3390/jpm11080738), 2021-07-28
Supplement: s1 [file s1]

**Supplementary Table S2.** Adipogenic cocktails used for dental tissue-derived stem cells and adipose derived stem cells

| Dental stem cells      |                        | SHED        | SHED         | SHED          | SHED         | SHED        | DPSCs         | DPSCs         | DPSCs         | DPSCs         | DPSCs         |
|------------------------|------------------------|-------------|--------------|---------------|--------------|-------------|---------------|---------------|---------------|---------------|---------------|
| Basic Conditions       | Basal media            | DMEM/F12    | Dulbeco      | $\alpha$ -MEM | DMEM/F12     | DMEM/F12    | $\alpha$ -MEM |
|                        | FBS                    | 10%         | 10%          | 10%           | 10%          | 10%         | 10%           | 10%           | 15%           | 10%           | 10%           |
| Basic chemical factors | DEXA                   | 1 mM        | 1 $\mu$ M    | -             | 1 mM         | 1 mM        | 1 $\mu$ M     | 100 nM        | -             | 0.5 $\mu$ M   | 10 nM         |
|                        | INS                    | -           | 10 $\mu$ M   | 10 $\mu$ M    | 1.72 $\mu$ M | 10 $\mu$ M  | 0.172 $\mu$ M | -             | 1.72 $\mu$ M  | -             | 2 mM          |
|                        | IBMX                   | 500 $\mu$ M | 500 $\mu$ M  | 500 $\mu$ M   | 500 $\mu$ M  | 500 $\mu$ M | 500 $\mu$ M   | -             | 500 $\mu$ M   | 0.5 $\mu$ M   | 500 $\mu$ M   |
|                        | INDO                   | 60 $\mu$ M  | 2000 $\mu$ M | 60 $\mu$ M    | 60 $\mu$ M   | 200 mM      | -             | 140 mM        | 50 $\mu$ M    | 50 $\mu$ M    | -             |
| Others                 | Hidro C                | -           | -            | 0.5 $\mu$ M   | -            | -           | -             | -             | 0.5 $\mu$ M   | -             | -             |
|                        | Asc ac                 | -           | -            | -             | -            | -           | -             | -             | 100 $\mu$ M   | -             | -             |
| Induction time         | Differentiation (days) | 14          | 21           | 42            | 14           | 14          | 56            | 21            | 28            | 28            | 21            |
| References             |                        | [1]         | [2]          | [3]           | [4]          | [5]         | [6]           | [7]           | [8]           | [9]           | [10]          |

ASC: human adipose derived stem cells, Asc ac: Ascorbic acid, DPSCs: dental pulp stem cells, DFSCs: dental follicle stem cells, DEXA: dexamethasone, FBS: fetal bovine serum, GMSCs: gingival-derived mesenchymal stem cells, Hidro C: hydrocortisone, INDO: indomethacin, INS: insulin, IBMX: isobutyl-methyl-xanthine, PDLSCs: periodontal ligament stem cells, SHED: stem cells from human exfoliated deciduous teeth. – not reported or not applicable.

**Supplementary Table 2.** Adipogenic cocktails used for dental tissue-derived stem cells and adipose derived stem cells (Continue)

| Dental stem cells      |                        | PLSCs          |               | PLSCs         | GMSCs         | ASCs        | ASCs        |
|------------------------|------------------------|----------------|---------------|---------------|---------------|-------------|-------------|
|                        |                        | DPSCs<br>DFSCs |               |               |               |             |             |
| Basic Conditions       | Basal media            | $\alpha$ -MEM  | $\alpha$ -MEM | $\alpha$ -MEM | $\alpha$ -MEM | DMEM/F12    | DMEM/F12    |
|                        | FBS                    | 10%            | 10%           | -             | 10%           | 10%         | 10%         |
| Basic chemical factors | DEXA                   | 1 mM           | -             | 100 nM        | 1 nM          | 1 $\mu$ M   | 1 $\mu$ M   |
|                        | INS                    | -              | 10 $\mu$ M    | -             | -             | -           | 10 $\mu$ M  |
|                        | IBMX                   | -              | 500 $\mu$ M   | 500 $\mu$ M   | 500 $\mu$ M   | 549 $\mu$ M | 500 $\mu$ M |
|                        | INDO                   | 60 mM          | 60 mM         | 50 mM         | 100 $\mu$ M   | 66 $\mu$ M  | 200 $\mu$ M |
| Others                 | Hidro C                | -              | 500 $\mu$ M   | -             | -             | 549 $\mu$ M | -           |
|                        | Asc ac                 | -              | 100 $\mu$ M   | -             | 250 $\mu$ M   | -           | -           |
| Induction time         | Differentiation (days) | -              | 28            | 14            | 21            | 21          | 21          |
| References             |                        | [11]           | [12]          | [13]          | [14]          | [15]        | [16]        |

ASC: human adipose derived stem cells, Asc ac: Ascorbic acid, DPSCs: dental pulp stem cells, DFSCs: dental follicle stem cells, DEXA: dexamethasone, FBS: fetal bovine serum, GMSCs: gingival-derived mesenchymal stem cells, Hidro C: hydrocortisone, INDO: indomethacin, INS: insulin, IBMX: isobutyl-methyl-xanthine, PDLSCs: periodontal ligament stem cells, SHED: stem cells from human exfoliated deciduous teeth. – no included or reported.

## Supplementary References

1. Yalvac, M.E.; Ramazanoglu, M.; Rizvanov, A.A.; Sahin, F.; Bayrak, O.F.; Salli, U.; Palotas, A.; Kose, G.T. Isolation and characterization of stem cells derived from human third molar tooth germs of young adults: implications in neo-vascularization, osteo-, adipo- and neurogenesis. *Pharmacogenomics J* **2010**, *10*, 105-113.
2. Pisciotta, A.; Riccio, M.; Carnevale, G.; Beretti, F.; Gibellini, L.; Maraldi, T.; Cavallini, G.M.; Ferrari, A.; Bruzzesi, G.; De Pol, A. Human serum promotes osteogenic differentiation of human dental pulp stem cells in vitro and in vivo. *PLoS One* **2012**, *7*, e50542.
3. Ma, L.; Makino, Y.; Yamaza, H.; Akiyama, K.; Hoshino, Y.; Song, G.; Kukita, T.; Nonaka, K.; Shi, S.; Yamaza, T. Cryopreserved dental pulp tissues of exfoliated deciduous teeth is a feasible stem cell resource for regenerative medicine. *PLoS One* **2012**, *7*, e51777.
4. Zhang, N.; Chen, B.; Wang, W.; Chen, C.; Kang, J.; Deng, S.Q.; Zhang, B.; Liu, S.; Han, F. Isolation, characterization and multi-lineage differentiation of stem cells from human exfoliated deciduous teeth. *Mol Med Rep* **2016**, *14*, 95-102.
5. Gazarian, K.G.; Ramirez-Garcia, L.R. Human Deciduous Teeth Stem Cells (SHED) Display Neural Crest Signature Characters. *PLoS One* **2017**, *12*, e0170321.
6. Al-Habib, M.; Yu, Z.; Huang, G.T. Small molecules affect human dental pulp stem cell properties via multiple signaling pathways. *Stem Cells Dev* **2013**, *22*, 2402-2413.
7. Navabazam, A.R.; Sadeghian Nodoshan, F.; Sheikha, M.H.; Miresmaeili, S.M.; Soleimani, M.; Fesahat, F. Characterization of mesenchymal stem cells from human dental pulp, preapical follicle and periodontal ligament. *Iran J Reprod Med* **2013**, *11*, 235-242.
8. Hsieh, S.C.; Tsao, J.T.; Lew, W.Z.; Chan, Y.H.; Lee, L.W.; Lin, C.T.; Huang, Y.K.; Huang, H.M. Static magnetic field attenuates lipopolysaccharide-induced inflammation in pulp cells by affecting cell membrane stability. *ScientificWorldJournal* **2015**, *2015*, 492683.
9. Ponnaiyan, D.; Jegadeesan, V. Comparison of phenotype and differentiation marker gene expression profiles in human dental pulp and bone marrow mesenchymal stem cells. *Eur J Dent* **2014**, *8*, 307-313.
10. Zhang, X.; Li, H.; Sun, J.; Luo, X.; Yang, H.; Xie, L.; Yang, B.; Guo, W.; Tian, W. Cell-derived micro-environment helps dental pulp stem cells promote dental pulp regeneration. *Cell Prolif* **2017**, *50*.

11. Karamzadeh, R.; Baghaban Eslaminejad, M.; Sharifi-Zarchi, A. Comparative In Vitro Evaluation of Human Dental Pulp and Follicle Stem Cell Commitment. *Cell J* **2017**, *18*, 609-618.
12. Hamano, S.; Tomokiyo, A.; Hasegawa, D.; Yoshida, S.; Sugii, H.; Mitarai, H.; Fujino, S.; Wada, N.; Maeda, H. Extracellular Matrix from Periodontal Ligament Cells Could Induce the Differentiation of Induced Pluripotent Stem Cells to Periodontal Ligament Stem Cell-Like Cells. *Stem Cells Dev* **2018**, *27*, 100-111.
13. Zhang, J.; An, Y.; Gao, L.N.; Zhang, Y.J.; Jin, Y.; Chen, F.M. The effect of aging on the pluripotential capacity and regenerative potential of human periodontal ligament stem cells. *Biomaterials* **2012**, *33*, 6974-6986.
14. Van Pham, P.; Tran, N.Y.; Phan, N.L.; Vu, N.B.; Phan, N.K. Vitamin C stimulates human gingival stem cell proliferation and expression of pluripotent markers. *In Vitro Cell Dev Biol Anim* **2016**, *52*, 218-227.
15. Khan, A.; Dellago, H.; Terlecki-Zaniewicz, L.; Karbiener, M.; Weilner, S.; Hildner, F.; Steininger, V.; Gabriel, C.; Muck, C.; Jansen-Durr, P., et al. SNEV(hPrp19/hPso4) Regulates Adipogenesis of Human Adipose Stromal Cells. *Stem Cell Reports* **2017**, *8*, 21-29.
16. Nuermaimaiti, N.; Liu, J.; Liang, X.; Jiao, Y.; Zhang, D.; Liu, L.; Meng, X.; Guan, Y. Effect of lncRNA HOXA11-AS1 on adipocyte differentiation in human adipose-derived stem cells. *Biochem Biophys Res Commun* **2018**, *495*, 1878-1884.
