# Supplementary material for: Similar Features, Different Behaviors: A Comparative In Vitro Study of the Adipogenic Potential of Stem Cells from Human Follicle, Dental Pulp, and Periodontal Ligament
Source: MDPI journal article supplement (doi:10.3390/jpm11080738), 2021-07-28
Supplement: s1 [file s1]

**Supplementary Table S1.** Primers sequences used in the experiment.

| <b>Amplicon name</b>           | <b>Primer sequence (5'-3')</b>                                  | <b>Used for</b> | <b>References</b> |
|--------------------------------|-----------------------------------------------------------------|-----------------|-------------------|
| <b>NANOG</b>                   | F 5'-TGCTGAGATGCCTCACACGGA-3'<br>R 5'-TGACCGGGACCTTGTCTTCCTT-3' | RT-PCR          | 1                 |
| <b>c-MYC</b>                   | F 5'-GGACCCGCTTCTCTGAAAGG-3'<br>R 5'-TAACGTTGAGGGGCATCGTC-3'    | RT-PCR          | 1                 |
| <b>OCT4</b>                    | F5'-GAAAGGGACCGAGGAGTA-3'<br>R 5'-CCGAGTGTGGTTCTGTAAC-3'        | RT-PCR          | 2                 |
| <b>SOX2</b>                    | F5'-ACACCAATCCCATCCACACT-3'<br>R 5'-CCTCCCCAGGTTTTCTCTGT-3'     | RT-PCR          | 1                 |
| <b>KLF4</b>                    | F 5'-TACCAAGAGCTCATGCCACC-3'<br>R 5'-CGCGTAATCACAAGTGTGGG-3'    | RT-PCR          | 1                 |
| <b>CD73</b>                    | F 5'-CAGCATTCTGAAGATCCAAG-3'<br>R 5'-GATTGAGAGGAGCCATCCAG-3'    | RT-PCR          | 3                 |
| <b>CD90</b>                    | F 5'-GTCCTCTACTTATCCGCCTTC-3'<br>R 5'-GACCAGTTTGTCTCTGAGCAC-3'  | RT-PCR          | 3                 |
| <b>CD105</b>                   | F 5'-CTCAAGACCAGGAAGTCCATA-3'<br>R 5'-GATGAGGAAGGCACCAAAG-3'    | RT-PCR          | 3                 |
| <b>PPAR<math>\gamma</math></b> | F 5'-CAGTGGGGATGCTCATAA-3'<br>R 5'-CTTTTGGCATACTCTGTGAT-3'      | qPCR            | 4                 |
| <b>LPL</b>                     | F 5'-ATGGATGGACGGTGACAGGA-3'<br>R 5'-CCAAGACTGTACCCTAAGAGGTG-3' | qPCR            | 5                 |
| <b>ADIPOQ</b>                  | F 5'-ATGGTCCTGTGATGCTTTGA-3'<br>R 5'-GTTGAGTGCGTATGTTATTTTT-3'  | qPCR            | 4                 |
| <b>GADPH</b>                   | F 5'-CTTTGGCGTGGAAGGACTC-3'<br>R 5'-GTAGAGGCAGGGATGATGTTCT-3'   | RT-PCR/qPCR     | 6                 |

### Supplementary References

1. Irie, N.; Weinberger, L.; Tang, W. W.; Kobayashi, T.; Viukov, S.; Manor, Y. S.; Dietmann, S.; Hanna, J. H.; Surani, M. A., SOX17 is a critical specifier of human primordial germ cell fate. *Cell* **2015**, *160* (1-2), 253-68.
2. Hara, E. S.; Ono, M.; Eguchi, T.; Kubota, S.; Pham, H. T.; Sonoyama, W.; Tajima, S.; Takigawa, M.; Calderwood, S. K.; Kuboki, T., miRNA-720 controls stem cell phenotype, proliferation and differentiation of human dental pulp cells. *PLoS One* **2013**, *8* (12), e83545.
3. Bogdanova, A.; Berzins, U.; Nikulshin, S.; Skrastina, D.; Ezerta, A.; Legzdina, D.; Kozlovska, T., Characterization of human adipose-derived stem cells cultured in autologous serum after subsequent passaging and long term cryopreservation. *J Stem Cells* **2014**, *9* (3), 135-48.
4. Karaoz, E.; Demircan, P. C.; Saglam, O.; Aksoy, A.; Kaymaz, F.; Duruksu, G., Human dental pulp stem cells demonstrate better neural and epithelial stem cell properties than bone marrow-derived mesenchymal stem cells. *Histochem Cell Biol* **2011**, *136* (4), 455-73.
5. Kim, D.; Kim, J.; Hyun, H.; Kim, K.; Roh, S., A nanoscale ridge/groove pattern arrayed surface enhances adipogenic differentiation of human supernumerary tooth-derived dental pulp stem cells in vitro. *Arch Oral Biol* **2014**, *59* (8), 765-74.
6. Liu, Z.; Chen, T.; Sun, W.; Yuan, Z.; Yu, M.; Chen, G.; Guo, W.; Xiao, J.; Tian, W., DNA demethylation rescues the impaired osteogenic differentiation ability of human periodontal ligament stem cells in high glucose. *Sci Rep* **2016**, *6*, 27447.
